# Supplementary material for: Physiological and Molecular Responses of ‘Dusa’ Avocado Rootstock to Water Stress: Insights for Drought Adaptation
Source: MDPI journal article supplement (doi:10.3390/plants10102077), 2021-09-30
Supplement: s1 [file s1]

**Supplementary Table S1.** qRT-PCR primer sequences used in this study.

| Description                                          | Contig/ GenBank ID    | Amplicon Tm (°C) | Amplicon size (bp) | Primer sequences (forward/reverse) [5'-3']       |
|------------------------------------------------------|-----------------------|------------------|--------------------|--------------------------------------------------|
| Actin                                                | Pa_Contig00256        | 58               | 104                | CCAAGCAGCATGAAGATAAAGGT<br>CACATCTGTTGGAAGGTGCTC |
| PR5                                                  | Pa_Contig01462        | 60               | 135                | GACACCAGCCTAGTCGATGG<br>TCCATCCGGTGCTGTCAATC     |
| Profilin 1 isoform 1                                 | Pa_Contig02273        | 58.5             | 110                | TTCGGTATCTATGATGAG<br>ACGATATGACATTCAATAG        |
| Protease inhibitor II                                | Pa_Contig03907        | 60               | 122                | GATGGCGCTGGTCAAGAAGA<br>AATGCTTGCTGGGAGTCTCG     |
| Alcohol dehydrogenase b                              | Pa_Sin_GI32N0T02IUGTU | 60               | 103                | TGGTGTCTGTGCTAGTAGGT<br>TTCCAAAGAAAGTCCCTTGAGAG  |
| LRR resistance PLP                                   | Pa_Contig01244        | 60               | 99                 | AGCACCCGTTCTTGAAGGAAA<br>CGGAGTCTGAAACCTCAAGC    |
| Trypsin inhibitor                                    | Pa_Contig04097        | 60               | 101                | TTCAATGTGCTTCTGGTGGCT<br>TTCGCCATCATCCCATCACC    |
| Sucrose synthase                                     | Pa_Contig00004        | 57               | 98                 | CATACATCAAACCGTGAGATCCA<br>TCAAGATGACCTGTGAAGCA  |
| Phenylalanine ammonia-lyase (PAL)                    | Pa_Contig00410        | 60               | 79                 | TTGATGACCCATGCAGCTGT<br>CCATTGATCAGCGCGTGTTT     |
| Chalcone synthase                                    | Pa_Contig00619        | 60               | 103                | AGGCAAGACATGGTGGTGG<br>CCAGGTGGGTGATCTTGGAC      |
| Xyloglucan endotransglucosylase hydrolase fam. prot. | Pa_Contig00751        | 60               | 97                 | TCCTCAGCGCATCATCTTCTC<br>CATGGGCTGCTTGTTAGGGA    |
| Defensin j1-2-like                                   | Pa_Contig04185        | 60               | 145                | GCTGCTCGTTCTTCTTCTCCT<br>ATGGAAGCCTTAATCCTGCA    |
| Lipoxygenase (LOX)                                   | Pa_Contig04337        | 60               | 72                 | CGAACATGCCAGTGGAGG<br>ACATTGCAGACTCAGGCC         |
| PR4                                                  | Pa_Contig06278        | 60               | 136                | TTGACACTGACGGAAGAGG<br>TGTAATCAGTCGCCGCAG        |
